# Supplementary material
Source: PubMed Central journal article supplement (PMC6505768)
Supplement: DS1_JVDI_10.1177_1040638718812123.pdf [file DS1_JVDI_10.1177_1040638718812123.pdf]

**Supplementary data.** Methodology of adenovirus and herpesvirus PCR assays.

### **Adenovirus PCR**

Extracted DNA from 25 mg of formalin-fixed, paraffin-embedded hedgehog lung: paraffin-embedded tissue ( $2 \times 25 \mu\text{m}$  sections) were dewaxed with 1 mL of xylene 3 times and washed with 1 mL of 100% ethanol, 1 mL of 90% ethanol, and 1 mL of 70% ethanol. The pellet was resuspended in 95  $\mu\text{L}$  of  $\text{H}_2\text{O}$ . DNA extraction and purification were performed (ZR genomic DNA tissue miniprep kit, Zymo Research), according to the manufacturer's instructions using 100  $\mu\text{L}$  of DNA elution buffer and stored at  $-20^\circ\text{C}$  until needed.

### *Degenerate PCR*

Nested PCR amplification of a partial sequence of the adenoviral DNA polymerase gene was performed. The 25- $\mu\text{L}$  first-round reactions contained HotStarTaq Plus master mix (Qiagen), 2.5  $\mu\text{L}$  of extracted DNA, 0.2  $\mu\text{M}$  concentrations for each primer (forward primer, polFouter [5'-TYMGVGGVGGBMGVTGYTAYCC-3'], reverse primer, polRouter [5'-GTRGCRAANSWSCCARTASAGGGCRTT-3']). The mixtures were amplified with an initial denaturation at  $95^\circ\text{C}$  for 5 min followed by 40 cycles at  $94^\circ\text{C}$  for 30 s,  $50^\circ\text{C}$  for 30 s, and  $72^\circ\text{C}$  for 30 s. There was a final extension at  $72^\circ\text{C}$  for 10 min. For the second round, 1  $\mu\text{L}$  of product from the first-round reaction was used for fully nested PCR with forward primer polFinner (5'-GTBTATGAYATHHTGYGGSATGTATGC-3') and reverse primer polRinner (5'-CCABYYKCKGTTTRTG HARVGTRA-3') or semi-nested using either primer pairs polFouter/polRinner or polFinner/polRouter. Second-round reactions were amplified under the same conditions as the first round. Primers are modified from those reported previously.<sup>3</sup>

## Herpesvirus PCR

A pan-herpesvirus nested PCR assay was performed with degenerated consensus.<sup>1,2</sup> For the first PCR round, the reaction contained 12.5  $\mu$ L of GoTaq Green master mix (Promega), 0.25  $\mu$ L (of 20  $\mu$ M) of each primer (DFA, ILK, and KG1), 6.75  $\mu$ L of DEPC-treated water, and 5  $\mu$ L of DNA sample. One  $\mu$ L of the amplified product was added to the second PCR mix with 0.25  $\mu$ L (of 20  $\mu$ M) of primer TGV and IYG. The cycling protocol for the first and second PCR corresponds to a published protocol.<sup>1</sup> An ovine herpesvirus 2–positive DNA extract from cattle brain tissue served as positive control. PCR products were analyzed by electrophoresis in 1% (w/v) agarose gels.

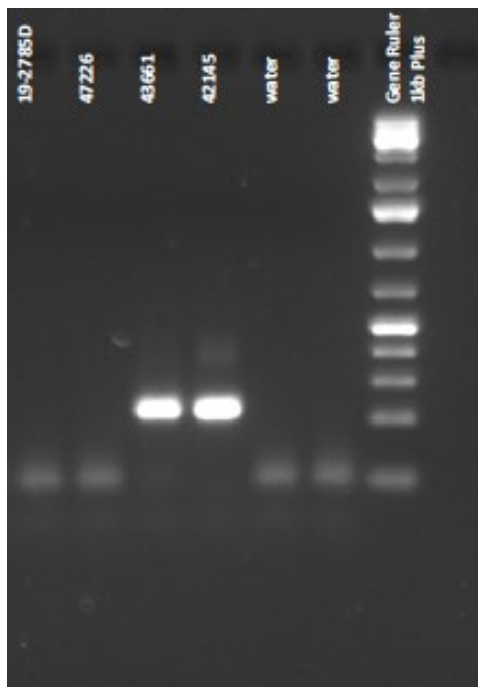

26324, 42145, and 43661: positive controls

47226: negative control

19-2785D: hedgehog lung tissue

## References

1. Ehlers B, et al. Detection of new DNA polymerase genes of known and potentially novel herpesviruses by PCR with degenerate and deoxyinosine-substituted primers. *Virus Genes* 1999;18:211–220.
2. VanDevanter DR, et al. Detection and analysis of diverse herpesviral species by consensus primer PCR. *J Clin Microbiol* 1996;34:1666–1671.
3. Wellehan JF, et al. Detection and analysis of six lizard adenoviruses by consensus primer PCR provides further evidence of a reptilian origin for the atadenoviruses. *J Virol* 2004;78:13366–13369.
